# Supplementary material for: Superhydrophobic and superoleophilic graphene aerogel prepared by facile chemical reduction
Source: Royal Society of Chemistry journal article supplement (doi:10.1039/c5ta00383k), 2015-01-01

## Electronic Supplementary Information (ESI)

### Superhydrophobic and superoleophilic graphene aerogel prepared by facile chemical reduction

Liming Xu, Guyu Xiao<sup>\*</sup>, Caibao Chen, Run Li, Yiyong Mai, Guoming Sun and Deyue Yan  
*School of Chemistry and Chemical Engineering, State Key Laboratory of Metal Matrix Composites, Shanghai Jiao Tong University, 800 Dongchuan Road, Shanghai 200240, P.R. China*

**Fig. S1** Video snapshots of the absorption process of a drop of hexadecane on the surface of GA

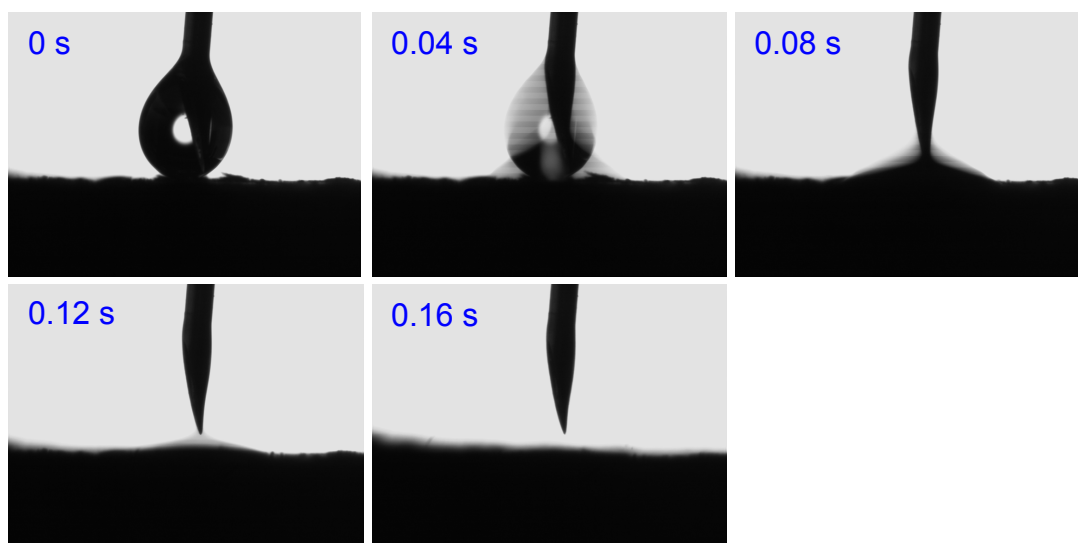

**Fig. S2** Optical image of GA immersed in water by an external force.

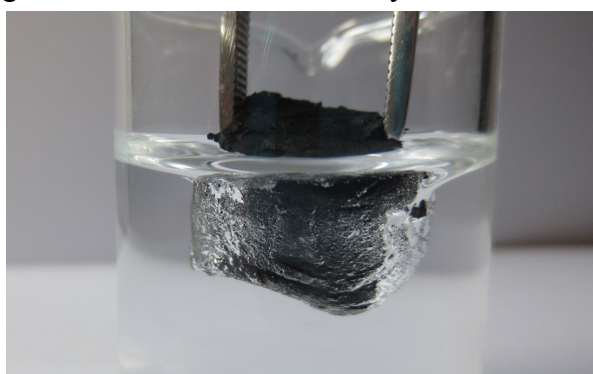

<sup>\*</sup> Corresponding author. Tel: +86 21 54742664, E-mail address: gyxiao@sjtu.edu.cn (G. Xiao)

**Fig. S3** Raman spectra of GO (a) and GA (b).

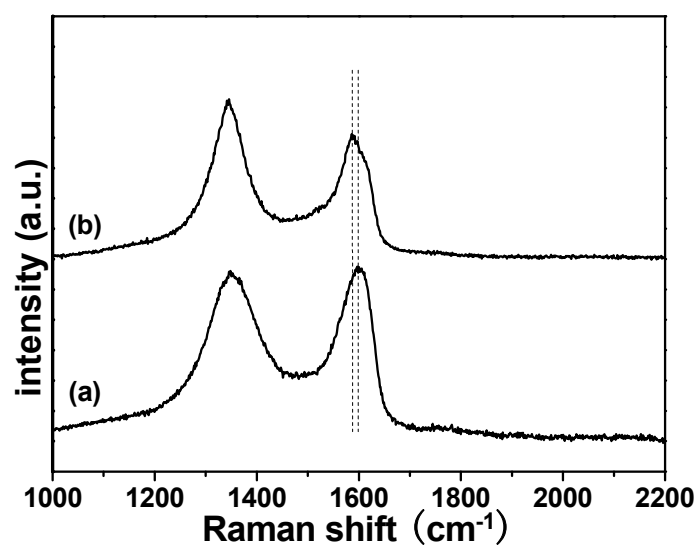

**Fig. S4** Absorption Capacity as a function of the density of solvents.

*(Order of the solvents according to the density: hexane, dodecane, cyclohexane, acetone, ethanol, methanol, kerosene, paraffin oil, toluene, pump oil, THF, dioxane, chloroform,  $\text{CCl}_4$ )*

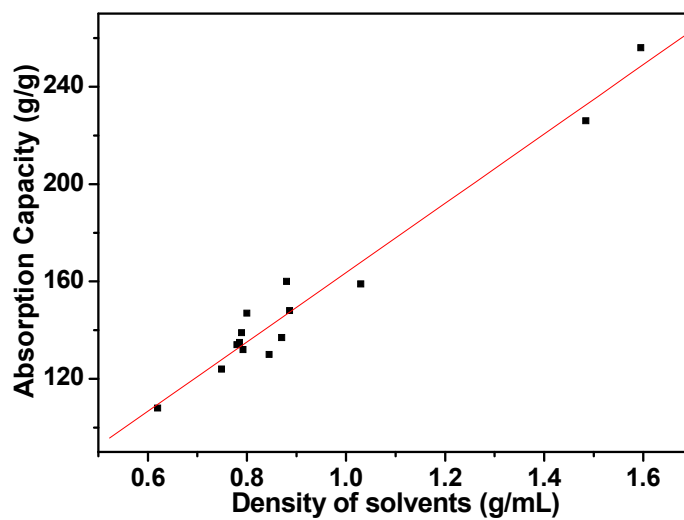

**Fig. S5** FT-IR spectra of three kinds of the recovered solvents from GA: a) acetone, b) dodecane, c) hexane.

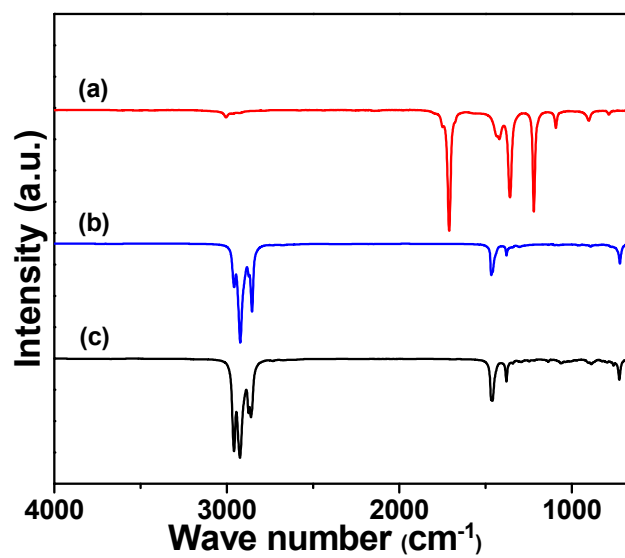

Supplement: c5ta00383k1.pdf [file c5ta00383k1.pdf]
